# Supplementary material for: Interfacial bridge-mediated electron transfer: mechanistic analysis based on electrochemical kinetics and theoretical modelling
Source: Royal Society of Chemistry journal article supplement (doi:10.1039/b611448b), 2006-10-30
Supplement: b611448b.pdf [file b611448b.pdf]

Electronic Supplementary Material for PCCP  
This journal is © The Owner Societies 2006

## **Supplementary Material to**

# **Interfacial bridge-mediated electron transfer: mechanistic analysis based on electrochemical kinetics and theoretical modelling**

Marshall. D. Newton\* and John F. Smalley\*

Department of Chemistry, Brookhaven National Laboratory, Upton, N.Y. 11973, USA.

## ESI

### DATA ANALYSIS

The open circuit potential (ILIT) transients were fit to<sup>1,2</sup>

$$\Delta E_{oc}(t) = A'\Delta T^*(t) + B'k_m(E_i) \int_0^t \exp[-k_m(E_i)(t-\tau)] \Delta T^*(\tau) d\tau \quad (S1)$$

where  $\Delta E_{oc}(t)$  is the change in the open circuit potential as a function of time,  $A'$  is the amplitude of the initial thermal response,  $B'$  is the amplitude associated with the ET relaxation (see eqn (S2) below), and  $k_m(E_i)$  is the measured (experimental) rate constant ( $s^{-1}$ ) for this relaxation at the initial applied potential ( $E_i$ ). The quantities  $A'$  and  $B'$  include  $E_{Soret}$  (see Fig. 4). ( $E_{Soret}$  is an effect of the temperature perturbation of the electrode, which causes a temperature gradient in the electrolyte solution, and this in turn causes a different free energy gradient for each type of ion in the solution; these free energy gradients induce a small potential difference in the electrolyte beyond the diffuse double layer.)  $\Delta T^*(t$  and  $\tau)$  in eqn (S1) is the convolution of the temperature perturbation at the working electrode/electrolyte interface and the ILIT instrument response function<sup>3</sup> divided by the interfacial potential change ( $\Delta T_{eq}$ ) that would be produced if all of the absorbed heat were uniformly distributed and none of this heat were lost to either the quartz disk or the electrolyte solution.<sup>1-3</sup> The parameter  $B'$  is defined by (for the equivalent circuit in Fig. 4)<sup>2</sup>

$$B' = \frac{\Delta E_{redox} - A'}{1 + (1/\gamma)[(1 + \omega(E_i))^2 / \omega(E_i)]} \quad (S2)$$

where<sup>4</sup>

$$\gamma = \frac{N_T F^2}{RT C_{\text{film}}} \quad (\text{S3})$$

in which  $N_T (= A(\Gamma_{\text{ox}} + \Gamma_{\text{red}}))$  is the total number of redox moieties in the mixed monolayer. The parameters  $\Delta E_{\text{redox}}$  and  $\omega(E_i)$  in eqn (S2) are defined by

$$\Delta E_{\text{redox}} = \Delta T_{\text{eq}} \frac{dE^{0'}}{dT} + \frac{\Delta T_{\text{eq}}}{T} (E_i - E^{0'}) \quad (\text{S4})$$

and

$$\omega(E_i) = \frac{\Gamma_{\text{ox}}}{\Gamma_{\text{red}}} = \exp\left[\frac{F}{RT} (E_i - E^{0'})\right] \quad (\text{S5})$$

An example of an ILIT transient (and the fit of this transient to eqn (S1)) is shown in Fig. S1.

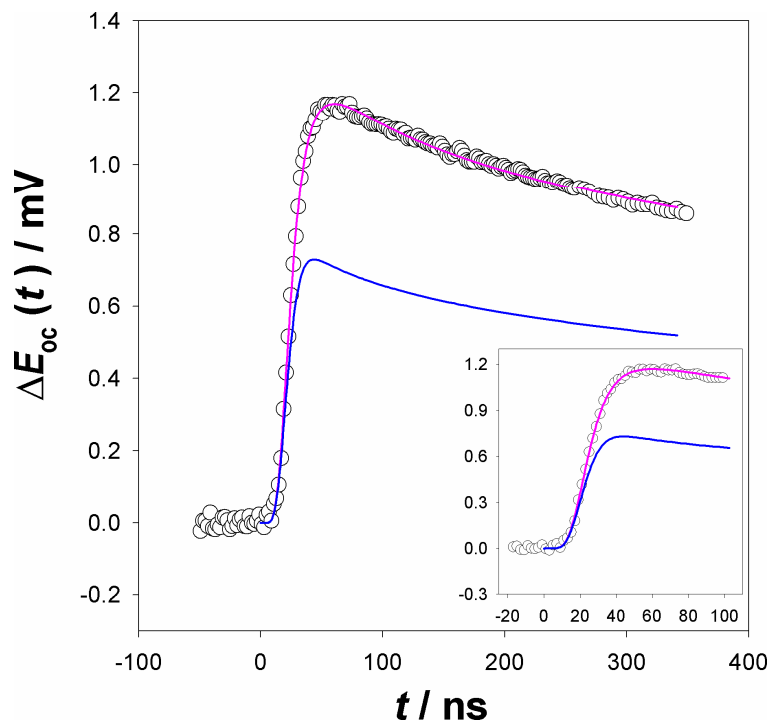

**Fig. S1.** ILIT response (open circles) from a Au electrode coated with a mixed monolayer composed of Fc-OPV ( $n=2$ , number ii (see Fig. 5)) and  $\text{HS}(\text{CH}_2)_9\text{CH}_3$  in contact with a 1.0M  $\text{HClO}_4$  electrolyte solution at  $E_i = 325\text{mV}$  vs SSCE ( $E^0 = 172\text{mV}$  vs SSCE (see Fig. S2)),  $T = 298\text{K}$  and  $\Delta T_{\text{eq}} = 4.4\text{K}$ . The pink curve describes a fit of these data to eq. S1 resulting in  $A' = 0.88\text{mV}$ ,  $B' = 0.60\text{mV}$  and  $k_m(E_i) = 7.8 \times 10^7 \text{s}^{-1}$ . The blue curve represents the response that would be observed if there were no relaxation of the ILIT signal caused by electron-transfer between the electrode and the Fc redox couple. The insert contains these same data over a shorter time range.

From the definition of  $B'$  in eqn (S2), it is apparent that  $B'$  becomes negligibly small when either  $\alpha(E_i) \gg 1.0$  or  $\alpha(E_i) \ll 1.0$ . This observation ensures that we can never measure an electron-transfer rate constant at more than “moderate” reaction free energies ( $|E_i - E^0|$ ) in our ILIT experiments so that assuming that these rate constants behave (as a function of  $E_i$ ) according to the Butler-Volmer formulation is always valid. The quantity  $k_m(E_i)$ , therefore, varies with potential according to<sup>4</sup>

$$k_m(E_i) = \frac{k^0 \gamma \omega(E_i)^{1/2}}{1 + \omega(E_i)} \left\{ 1 + \frac{[1 + \omega(E_i)]^2}{\gamma \omega(E_i)} \right\} \quad (\text{S6})$$

and values for the parameters  $k^0$ ,  $E^{0'}$  and  $\gamma$  may be obtained from fits of the  $k_m(E_i)$  versus  $E_i$  data to eqns (S5) and (S6). Figure S2 demonstrates a fit of  $k_m(E_i)$  measured as a function of potential to eqn (S6). We emphasize that evaluations of  $\gamma$  and  $E^{0'}$  obtained from fits such as those shown in Fig. S2 are the same (within experimental error) as those obtained from cyclic voltammograms.<sup>4</sup>

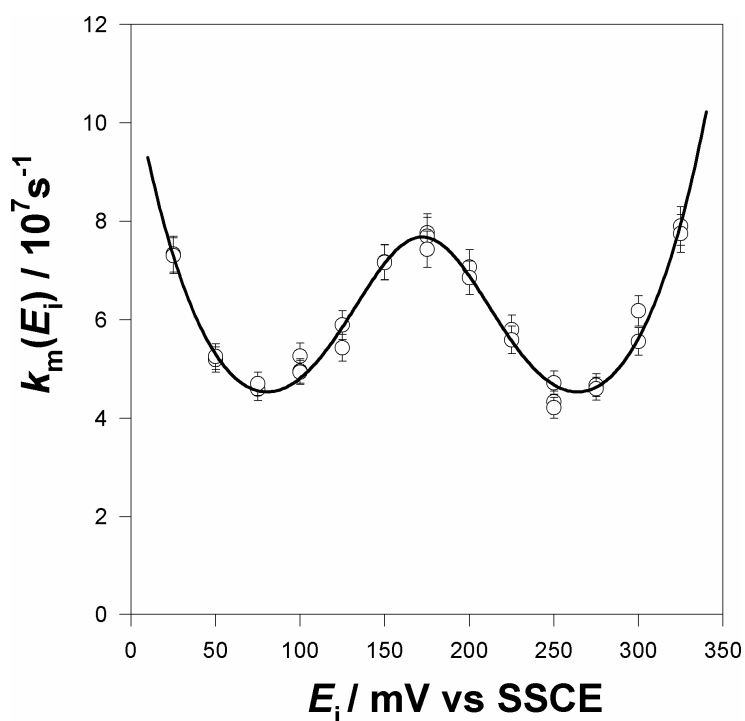

**Fig. S2.**  $k_m(E_i)$  as a function of  $E_i$  at  $T = 298\text{K}$  for the Au electrode/mixed monolayer combination described in the legend of Fig. S1. The solid line curve describes the fit of these data to eq. S6 resulting in  $k^0 = 3.7 \times 10^6 \text{s}^{-1}$ ,  $E^{0'} = 172 \text{mV vs SSCE}$  and  $\gamma = 38$  (the  $\gamma$  calculated from the cyclic voltammogram of this monolayer is also 38).

- <sup>1</sup> J. F. Smalley, L. Geng, S. W. Feldberg, L. C. Rogers, and J. Leddy, *J. Electroanal. Chem.*, 1993, **356**, 181.
- <sup>2</sup> J. F. Smalley, S. W. Feldberg, C. E. D. Chidsey, M. R. Linford, M. D. Newton, and Y.-P. Liu, *J. Phys. Chem.*, 1995, **99**, 13141.
- <sup>3</sup> S. W. Feldberg, M. D. Newton, and J. F. Smalley, in 'Electroanalytical Chemistry', ed. A. J. Bard and I. Rubinstein, New York, NY, 2003, Vol. 22, pp. 101-180.
- <sup>4</sup> J. F. Smalley, Newton, M.D., and Feldberg, S.W., *Electrochem. Commun.*, 2000, 832.
